# Supplementary material for: Maximizing the potential of high-throughput next-generation sequencing through precise normalization based on read count distribution
Source: PubMed Central journal article supplement (PMC10469589; doi:10.1128/msystems.00006-23), 2023-06-23
Supplement: reviewer-comments.pdf [file reviewer-comments.pdf]

AMERICAN  
SOCIETY FOR  
MICROBIOLOGY



# Maximizing the potential of high-throughput next-generation sequencing through precise normalization based on read-count distribution

Caitriona Brennan, Rodolfo Salido, Pedro Belda-Ferre, MacKenzie Bryant, Charles Cowart, Maria Tiu, Antonio González, Daniel McDonald, Caitlin Tribelhorn, Amir Zarrinpar, and Rob Knight

*Corresponding Author(s): Rob Knight, University of California San Diego*

---

## Review Timeline:

|                     |                 |
|---------------------|-----------------|
| Submission Date:    | January 5, 2023 |
| Editorial Decision: | March 7, 2023   |
| Revision Received:  | March 27, 2023  |
| Accepted:           | April 24, 2023  |

---

*Editor: Neha Sachdeva*

*Reviewer(s): The reviewers have opted to remain anonymous.*

## Transaction Report:

(Note: With the exception of the correction of typographical or spelling errors that could be a source of ambiguity, letters and reports are not edited. The original formatting of letters and referee reports may not be reflected in this compilation.)

**DOI:** <https://doi.org/10.1128/msystems.00006-23>

March 7, 2023

Dr. Rob Knight  
University of California, San Diego  
Pediatrics  
La Jolla, CA

Re: mSystems00006-23 (**Maximizing the potential of high-throughput next-generation sequencing through precise normalization based on read-count distribution**)

Dear Dr. Rob Knight:

Thank you for submitting your manuscript to mSystems. We have completed our review and I am pleased to inform you that, in principle, we expect to accept it for publication in mSystems. However, acceptance will not be final until you have adequately addressed the reviewer comments.

Thank you for the privilege of reviewing your work. Below you will find instructions from the mSystems editorial office and comments generated during the review.

### **Preparing Revision Guidelines**

To submit your modified manuscript, log onto the eJP submission site at <https://msystems.msubmit.net/cgi-bin/main.plex>. Go to Author Tasks and click the appropriate manuscript title to begin the revision process. The information that you entered when you first submitted the paper will be displayed. Please update the information as necessary. Here are a few examples of required updates that authors must address:

- Point-by-point responses to the issues raised by the reviewers in a file named "Response to Reviewers," NOT IN YOUR COVER LETTER.
- Upload a compare copy of the manuscript (without figures) as a "Marked-Up Manuscript" file.
- Each figure must be uploaded as a separate file, and any multipanel figures must be assembled into one file.
- Manuscript: A .DOC version of the revised manuscript
- Figures: Editable, high-resolution, individual figure files are required at revision, TIFF or EPS files are preferred

ASM policy requires that data be available to the public upon online posting of the article, so please verify all links to sequence records, if present, and make sure that each number retrieves the full record of the data. If a new accession number is not linked or a link is broken, provide production staff with the correct URL for the record. If the accession numbers for new data are not publicly accessible before the expected online posting of the article, publication of your article may be delayed; please contact the ASM production staff immediately with the expected release date.

For complete guidelines on revision requirements, please see the journal Submission and Review Process requirements at <https://journals.asm.org/journal/mSystems/submission-review-process>. **Submission of a paper that does not conform to mSystems guidelines will delay acceptance of your manuscript.**

Corresponding authors may [join or renew ASM membership](#) to obtain discounts on publication fees. Need to upgrade your membership level? Please contact Customer Service at [Service@asmusa.org](mailto:Service@asmusa.org).

Thank you for submitting your paper to mSystems.

The ASM Journals program strives for constant improvement in our submission and publication process. Please tell us how we can improve your experience by taking this quick [Author Survey](#).

Sincerely,

Neha Sachdeva

Editor, mSystems

Journals Department  
American Society for Microbiology  
1752 N St., NW

**Reviewer comments:**

Reviewer #1 (Comments for the Author):

This paper introduces a new method for NGS sample normalization based on read-counts. The new method offers a better way to track differences in metagenomes and metatranscriptomes amongst samples over fluorescent quantitation. As fluorescent quantitation will give a measurement of total sample, not necessarily sample that is amplified (and subsequently sequenced), this could provide increased confidence in comparing rarefied samples with limited material.

This paper is very well written. The only item I would consider changing is Fig.S2 so that Fluorescent quantification is on the same row and Read Count is on the same row, then alter legend accordingly.

Reviewer #2 (Comments for the Author):

This report from Brennan et al. demonstrates a new normalization method to correct for inaccuracies due to varying concentrations in the input volume. This work is significant in adding rigor to microbiome studies. There are a couple of questions that need further clarification.

While the method improves accuracy compared to qubit (most commonly used) in adjusting the input, what are the input volumes and cost (and resources) associated with running an iSeq first before the Novaseq run? Especially in low biomass critical patient samples, is this a feasible approach? Fecal pellets from mice have abundance of genomic material compared to patients samples such as swabs...

Can authors add more detail on the calculation for figure 2? How can this be applied to non-ribosomal reads? (or how can it be achieved)?

## Reviewer comments:

Reviewer #1 (Comments for the Author):

This paper introduces a new method for NGS sample normalization based on read-counts. The new method offers a better way to track differences in metagenomes and metatranscriptomes amongst samples over fluorescent quantitation. As fluorescent quantitation will give a measurement of total sample, not necessarily sample that is amplified (and subsequently sequenced), this could provide increased confidence in comparing rarefied samples with limited material.

This paper is very well written. The only item I would consider changing is Fig.S2 so that Fluorescent quantification is on the same row and Read Count is on the same row, then alter legend accordingly.

**Response:** *Thank you for the kind words and the suggested improvement. We have updated the figure and legend with your suggestion.*

Reviewer #2 (Comments for the Author):

This report from Brennan et al. demonstrates a new normalization method to correct for inaccuracies due to varying concentrations in the input volume. This work is significant in adding rigor to microbiome studies. There are a couple of questions that need further clarification.

While the method improves accuracy compared to qubit (most commonly used) in adjusting the input, what are the input volumes and cost (and resources) associated with running an iSeq first before the Novaseq run? Especially in low biomass critical patient samples, is this a feasible approach? Fecal pellets from mice have abundance of genomic material compared to patients samples such as swabs...

**Response:** *Thank you for your comment, and raising these important questions. We have added the following to main text on lines 122 - 127 and 132 - 138, to address these points:*

*“The steps for preparing this additional sequencing pool include two fragment length distribution analyses, size-selection, and quantification. As these steps are also required for preparing the final read count normalized pool, there are no additional capital costs, other than the iSeq. Further, the consumable costs are low when working with pooled*

*samples (~\$30 per pool). With personnel, it takes 1 technician approximately 6 hours to prepare each pool for sequencing.”*

*“ Moreover, the iSeq platform requires low input for a successful run, with a concentration of only 90 picomolar (pM) in 20 $\mu$ l. This feature makes it feasible to use this read count normalization method with samples that have limited genetic material, such as skin swabs or other low biomass samples. QC steps, such as quantification and size selection, are performed on pooled samples, therefore these steps also consume negligible amounts of each library.”*

Can authors add more detail on the calculation for figure 2? How can this be applied to non-ribosomal reads? (or how can it be achieved)?

**Response:** *Thank you for your question. To normalize by feature space, for example by non-ribosomal reads, we used SortMeRNA (version v2.1b with default parameters) on adapter trimmed, raw reads passing filter (PF) to partition metatranscriptomic reads into ribosomal and non-ribosomal reads. The counts of non-ribosomal reads (reads on target, Fig. 2) replaced the raw reads PF<sub>i</sub> terms in the numerator and denominator of the Reads%Index calculation (Fig. S1, #3).*

*We have expanded on this in the main text (lines lines 114 - 121) and in the Materials and Methods section (Pooling and Sequencing).*

April 24, 2023

Prof. Rob Knight  
University of California San Diego  
9500 Gilman Drive  
MC 0602  
La Jolla, CA 92093

Re: mSystems00006-23R1 (**Maximizing the potential of high-throughput next-generation sequencing through precise normalization based on read-count distribution**)

Dear Prof. Rob Knight:

Your manuscript has been accepted, and I am forwarding it to the ASM Journals Department for publication. For your reference, ASM Journals' address is given below. Before it can be scheduled for publication, your manuscript will be checked by the mSystems production staff to make sure that all elements meet the technical requirements for publication. They will contact you if anything needs to be revised before copyediting and production can begin. Otherwise, you will be notified when your proofs are ready to be viewed.

ASM policy requires that data be available to the public upon online posting of the article, so please verify all links to sequence records, if present, and make sure that each number retrieves the full record of the data. If a new accession number is not linked or a link is broken, provide production staff with the correct URL for the record. If the accession numbers for new data are not publicly accessible before the expected online posting of the article, publication of your article may be delayed; please contact the ASM production staff immediately with the expected release date.

As an open-access publication, mSystems receives no financial support from paid subscriptions and depends on authors' prompt payment of publication fees as soon as their articles are accepted.

**Publication Fees:** We have partnered with Copyright Clearance Center to collect author charges. You will soon receive a message from no-reply@copyright.com with further instructions. For questions related to paying charges through RightsLink, please contact Copyright Clearance Center by email at ASM\_Support@copyright.com or toll free at +1.877.622.5543. Hours of operation: 24 hours per day, 7 days per week. Copyright Clearance Center makes every attempt to respond to all emails within 24 hours. For a complete list of **Publication Fees**, including supplemental material costs, please visit our [website](#).

Corresponding authors may [join or renew ASM membership](#) to obtain discounts on publication fees. Need to upgrade your membership level? Please contact Customer Service at Service@asmusa.org.

If you would like to submit a potential Featured Image, please email a file and a short legend to msystems@asmusa.org. Please note that we can only consider images that (i) the authors created or own and (ii) have not been previously published. By submitting, you agree that the image can be used under the same terms as the published article. File requirements: square dimensions (4" x 4"), 300 dpi resolution, RGB colorspace, TIF file format.

**For mSystems research articles**, you are welcome to submit a short author video for your recently accepted paper. Videos are normally 1 minute long and are a great opportunity for junior authors to get greater exposure. Importantly, this video will not hold up the publication of your paper, and you can submit it at any time.

Details of the video are:

- Minimum resolution of 1280 x 720
- .mov or .mp4. video format
- Provide video in the highest quality possible, but do not exceed 1080p
- Provide a still/profile picture that is 640 (w) x 720 (h) max
- Provide the script that was used

We recognize that the video files can become quite large, and so to avoid quality loss ASM suggests sending the video file via <https://www.wetransfer.com/>. When you have a final version of the video and the still ready to share, please send it to mSystems staff at msystems@asmusa.org.

Thank you for submitting your paper to mSystems.

Sincerely,

Neha Sachdeva  
Editor, mSystems

Journals Department  
American Society for Microbiology  
1752 N St., NW  
Washington, DC 20036  
E-mail: [mSystems@asmusa.org](mailto:mSystems@asmusa.org)
